# Supplementary material
Source: Research Square preprint supplement (doi:10.21203/rs.3.rs-9907115/v1)
Supplement: Supplementary file 1 [file 5fd28c907cae654d4be95d37.docx]

**
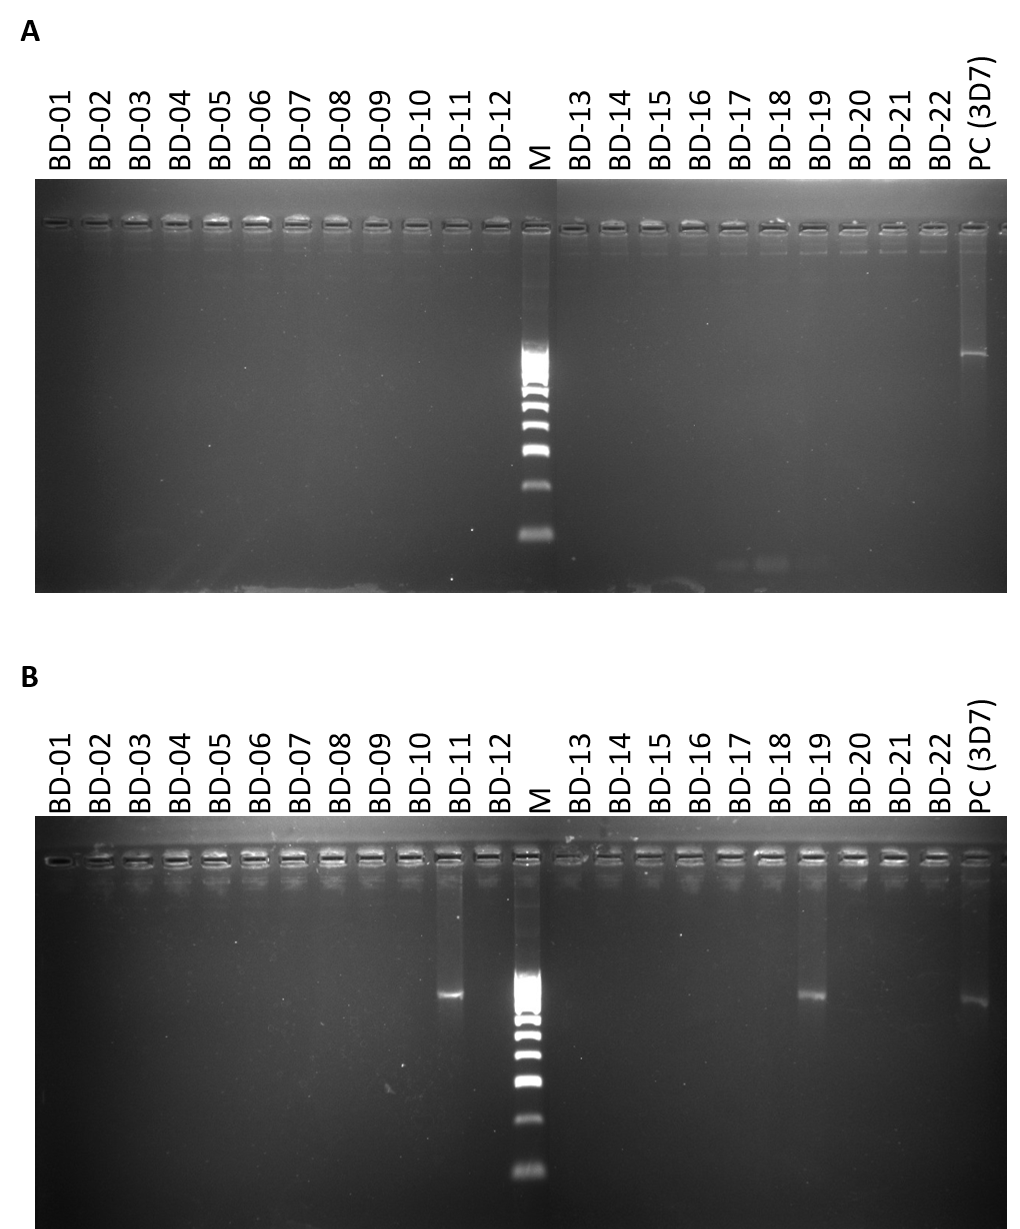
Supplementary Data:**

**Supplementary figure 1**: Agarose gel electrophoresis of PfHRP2 (A) and PfHRP3 (B) PCR amplification products.

PCR products targeting the PfHRP2 and PfHRP3 gene of *Plasmodium falciparum* were resolved on a 2% agarose gel and visualized under UV illumination. Lane Ladder: 100 bp DNA molecular weight marker (M); PC: positive control (3D7). Samples showing the expected band size indicate successful amplification of the PfHRP2 (750bp) and PfHRP3(700bp) gene.


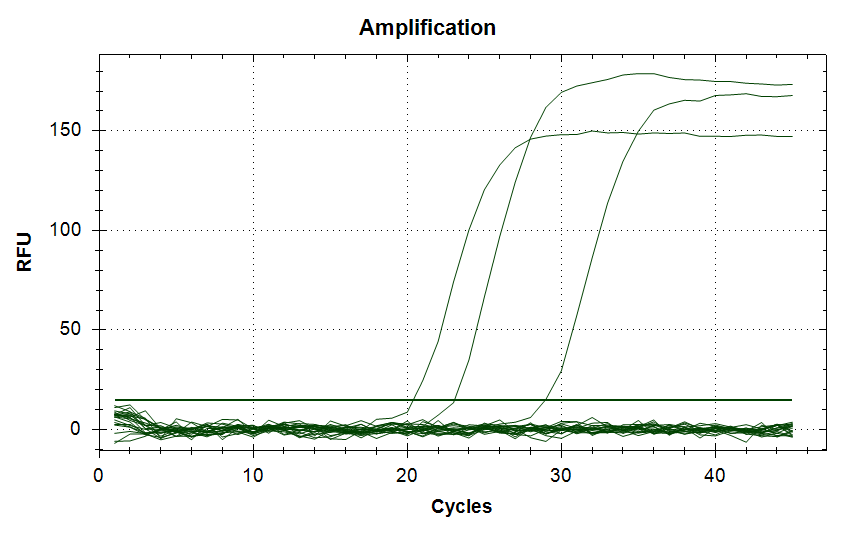


PC (3D7) **(3D7)**

BD-19

BD-11


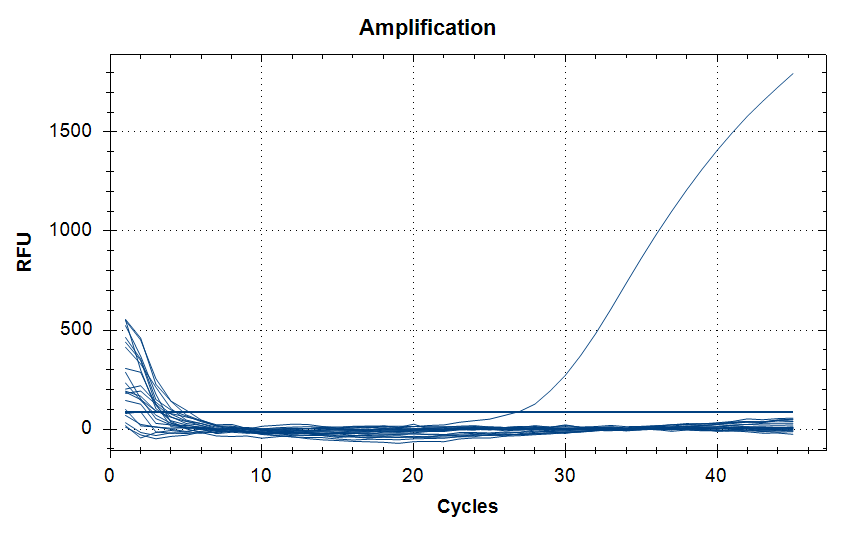


PC (3D7)

**A**

**B**

**Supplementary figure 2.** Amplification curves of PfHRP2 (A) and PfHRP3 (B) real-time PCR assay**.**

Real-time PCR amplification plots showing fluorescence signal versus cycle number for detection of the Plasmodium falciparum histidine-rich protein 2/3 (PfHRP2/PfHRP3) gene. Positive control samples (3D7) show exponential amplification with Ct values within the expected range, whereas no-template controls (NTC) and PfHRP2/PfHRP3-deleted samples show no detectable amplification. Only two samples (BD-11, BD-19) show detectable amplification for PfHRP3.
