# Supplementary material
Source: Research Square preprint supplement (doi:10.21203/rs.3.rs-9907115/v1)
Supplement: Supplementary file 2 [file 9585cca8171a33470fbfa31a.docx]

| **Table 1:** Comparative deletion status of *pfhrp2* and *pfhrp3* genes, the respective flanking regions in Bangladeshi isolates (*N* = 22). | | | | | | | | |
| --- | --- | --- | --- | --- | --- | --- | --- | --- |
| Sample ID | End point conventional PCR | | | | | | Probe-based real time PCR | |
| *pfhrp2* targets Del + | | | *pfhrp3* targets Del + | | | *pfhrp2* Del + | *pfhrp3* Del + |
| Upstream  (MAL7P1_230) | *pfhrp2* | Downstream (MAL7P1_228) | Upstream  (MAL13P1_485) | *pfhrp3* | Downstream (MAL13P1_475) | Ct values | |
| BD-01 | + | + | - | - | + | + | + | + |
| BD-02 | + | + | - | - | + | + | + | + |
| BD-03 | + | + | - | - | + | + | + | + |
| BD-04 | + | + | - | - | + | + | + | + |
| BD-05 | + | + | - | - | + | + | + | + |
| BD-06 | + | + | - | - | + | + | + | + |
| BD-07 | + | + | - | - | + | + | + | + |
| BD-08 | + | + | - | - | + | + | + | + |
| BD-09 | + | + | - | - | + | + | + | + |
| BD-10 | + | + | - | - | + | + | + | + |
| BD-11 | + | + | - | - | - | - | + | 23.05 |
| BD-12 | + | + | - | - | + | + | + | + |
| BD-13 | + | + | - | - | + | + | + | + |
| BD-14 | + | + | - | - | + | + | + | + |
| BD-15 | + | + | - | - | + | + | + | + |
| BD-16 | + | + | - | - | + | + | + | + |
| BD-17 | + | + | - | - | + | + | + | + |
| BD-18 | + | + | - | - | + | + | + | + |
| BD-19 | + | + | - | - | - | - | + | 28.93 |
| BD-20 | + | + | - | - | + | + | + | + |
| BD-21 | + | + | - | - | + | + | + | + |
| BD-22 | + | + | - | - | + | + | + | + |
| Del = Deletion; *pf*hrp = *Plasmodium falciparum* histidine-rich protein  + = Deletion; - = No deletion | | | | | | |  |  |
